# Supplementary material for: Effects of a Whole Plant Extract of Scutellaria rubropunctata var. rubropunctata on Bone Metabolism with Estrogen Receptor Activation
Source: MDPI journal article supplement (doi:10.3390/plants11162075), 2022-08-09
Supplement: s1 [file s1]

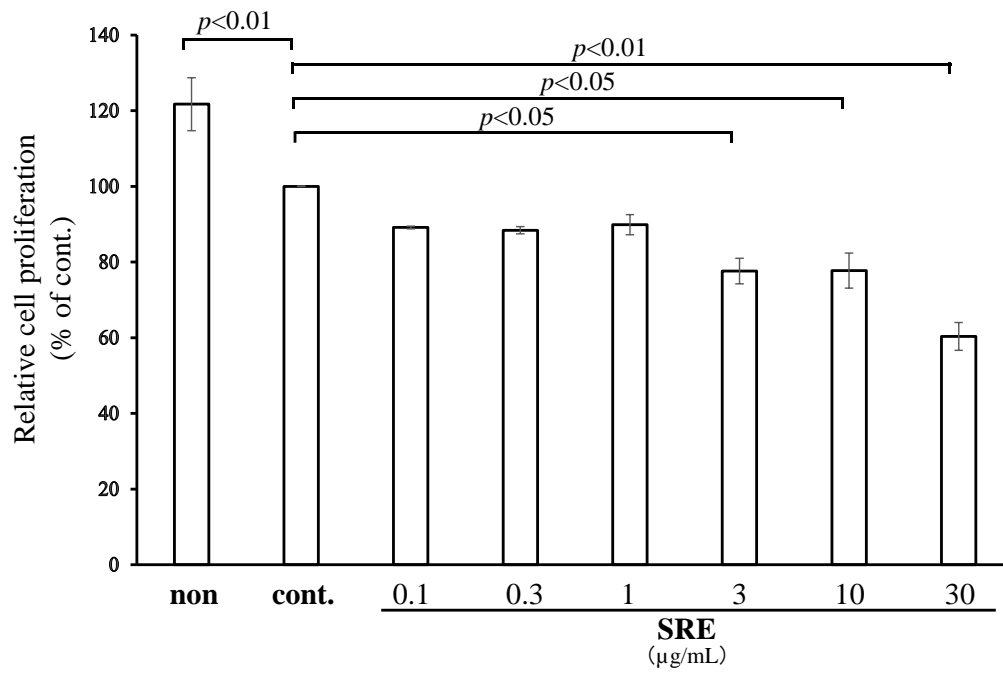

**Figure S1.** Cytotoxicity of SRE on MC3T3-E1 cells. Proliferation of MC3T3-E1 cells was assessed using the MTT assay. The control contained DMSO only. Data are the mean  $\pm$  SE of three independent experiments (n=3).

**a**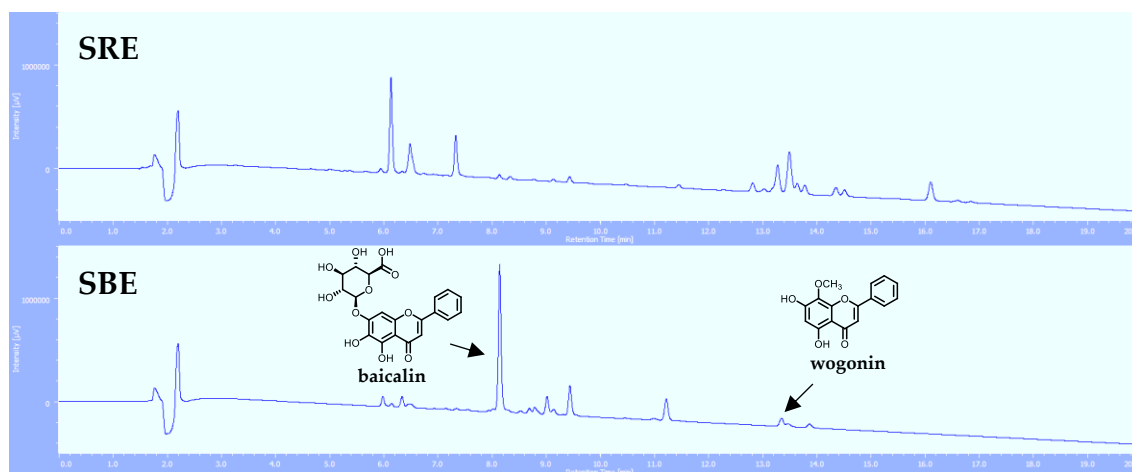**b**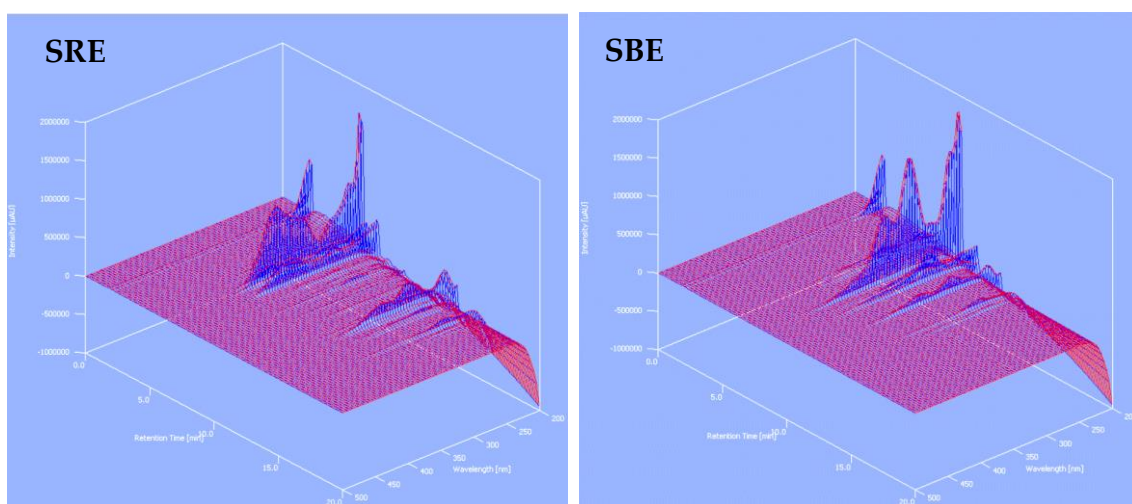

**Figure S2.** HPLC chromatograms of SRE and SBE. Detection: (a) 210 nm, (b) 200 – 500 nm.
